# Supplementary material
Source: PubMed Central journal article supplement (PMC6347507)
Supplement: NIHMS995516-supplement-Supp_FigS1-4.pdf [file NIHMS995516-supplement-Supp_FigS1-4.pdf]

Supplementary Figure 1.

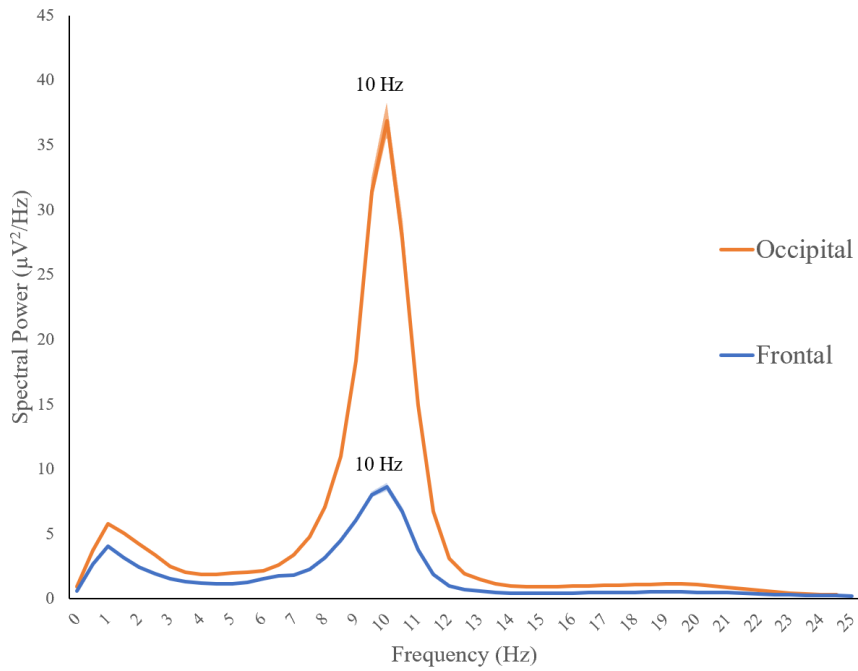

a) Mean eyes-closed spectra across stimulation conditions and participants. Error bars denote standard error of the mean.

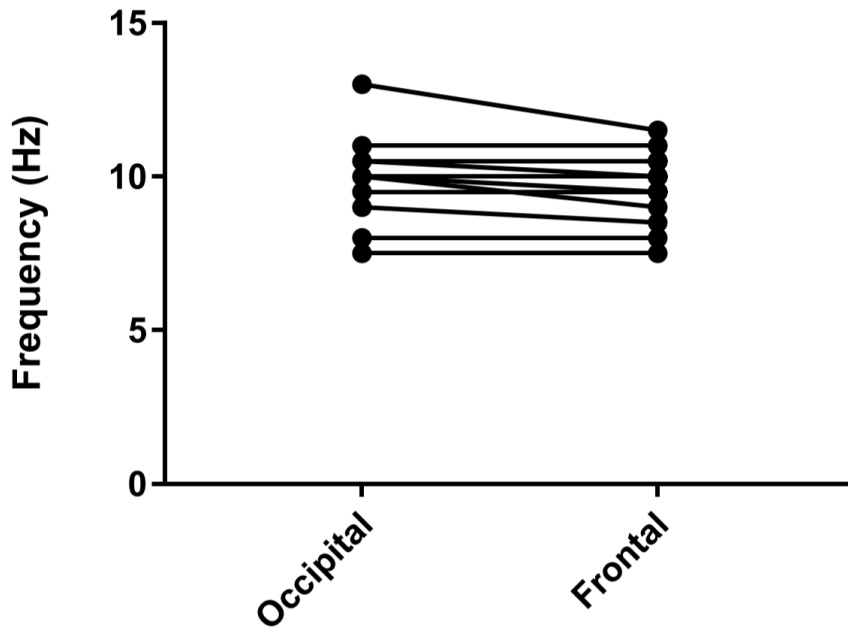

b) Mean eyes-closed individual alpha frequency across stimulation conditions. Individual alpha frequencies did not differ between occipital and frontal channels (paired samples t-test  $t(46) = 1.220$   $p = 0.229$ ).

**Supplementary Figure 2.**

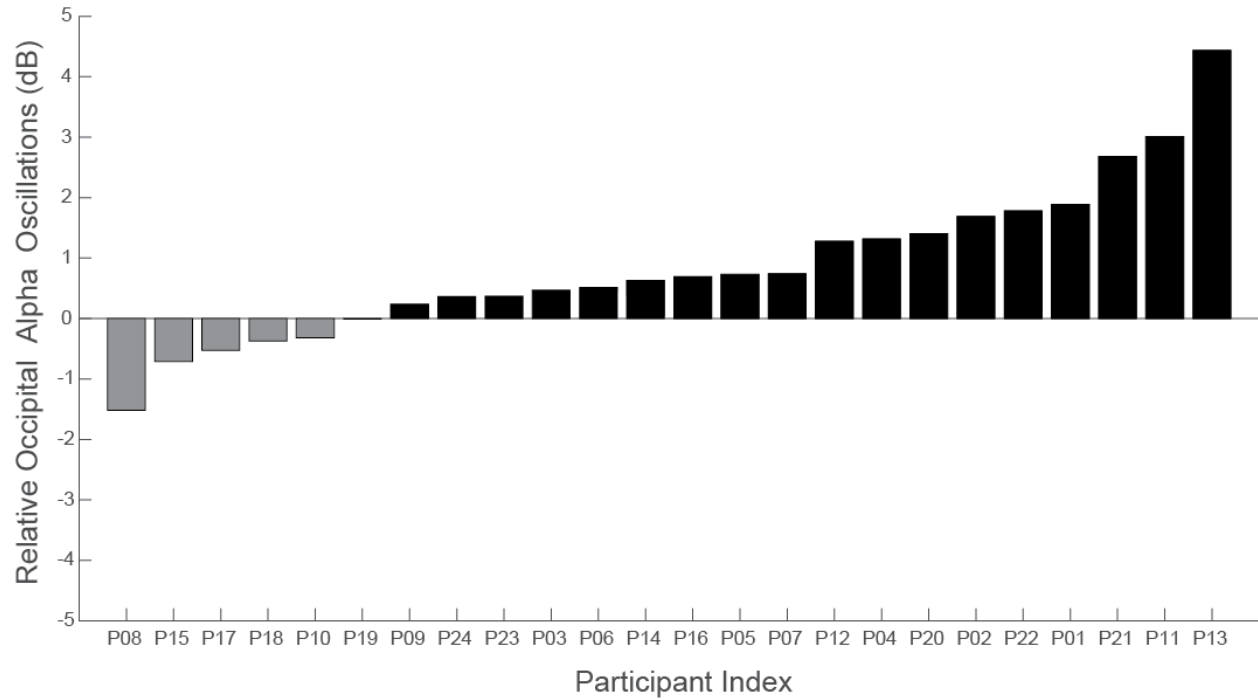

**a) Individual relative occipital alpha oscillations (IAF  $\pm$  2 Hz) during left DLPFC tSMS.**

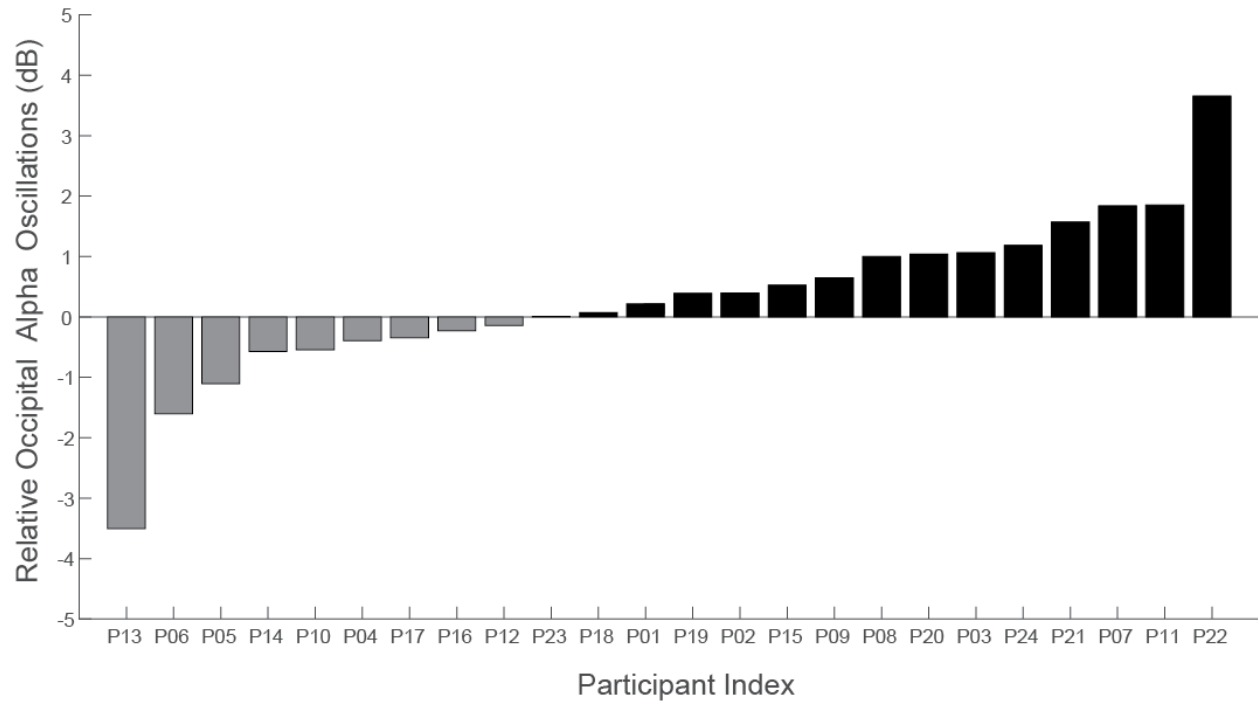

**b) Individual relative occipital alpha oscillations (IAF  $\pm$  2 Hz) during right DLPFC tSMS.**

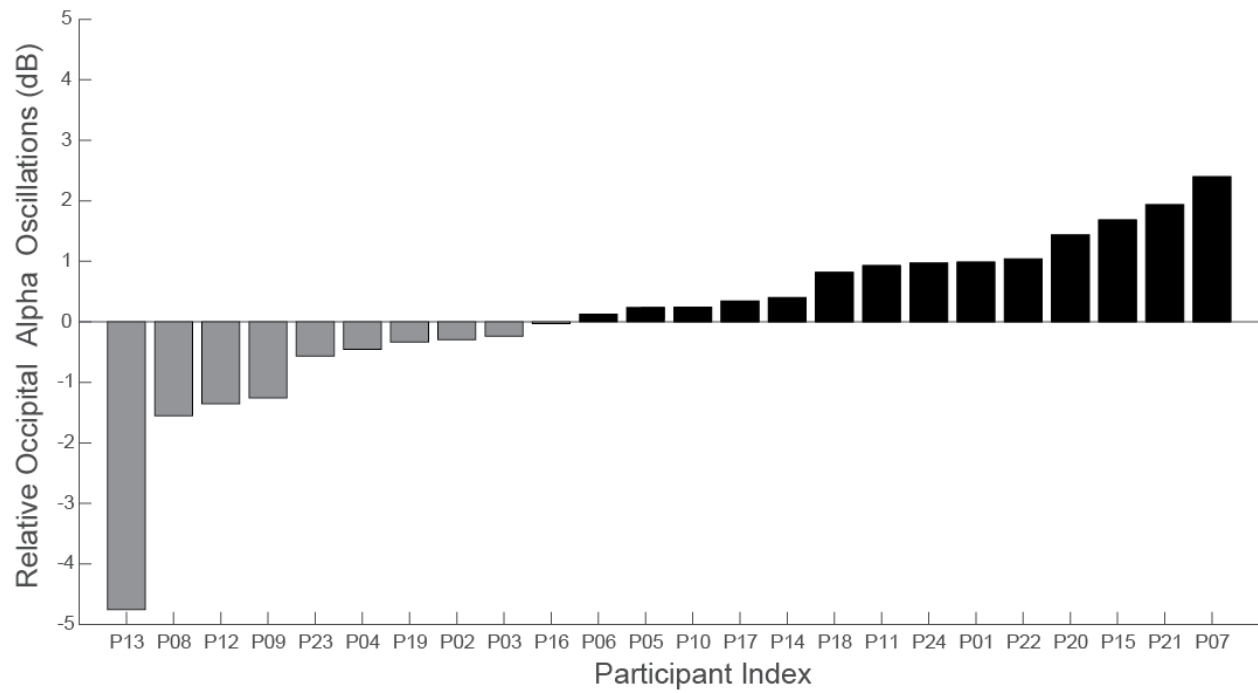

c) Individual relative occipital alpha oscillations ( $\text{IAF} \pm 2 \text{ Hz}$ ) during sham DLPFC tSMS.

**Supplementary Figure 3.**

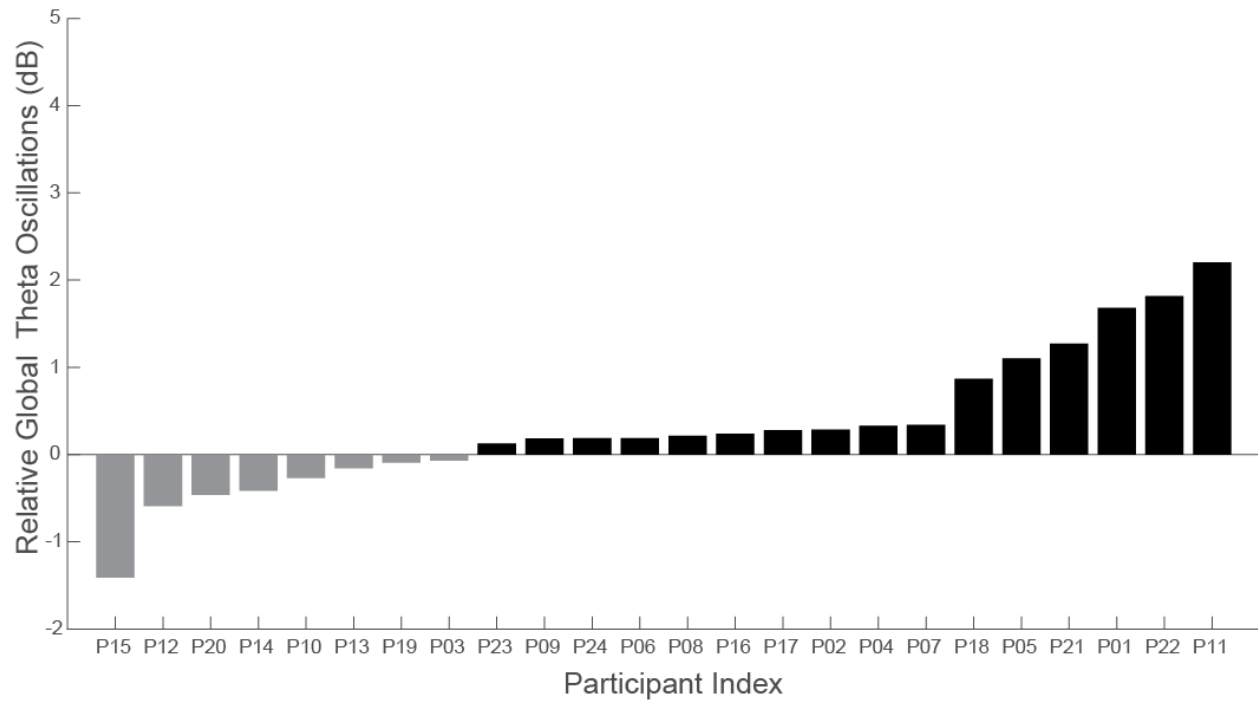

**a)** Individual relative global theta oscillations (4-8 Hz) post left DLPFC tSMS.

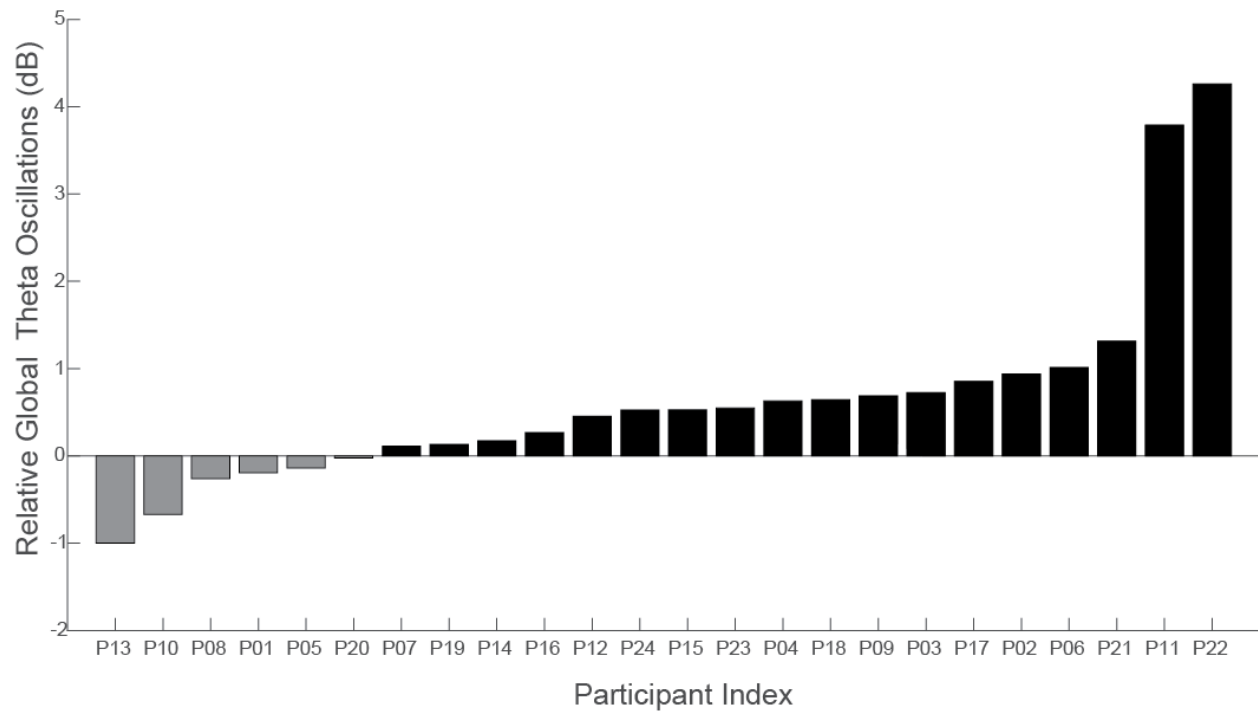

**b)** Individual relative global theta oscillations (4-8 Hz) post right DLPFC tSMS.

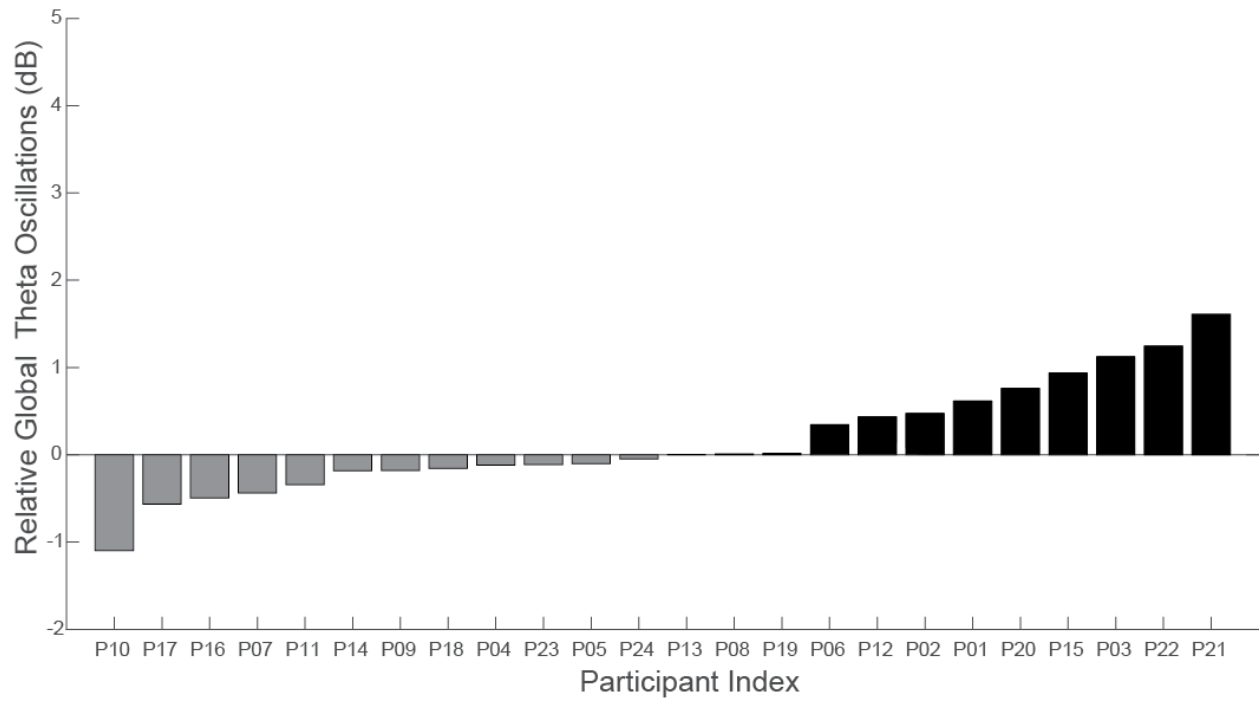

**c)** Individual relative global theta oscillations (4-8 Hz) post sham DLPFC tSMS.

### Supplementary Figure 4.

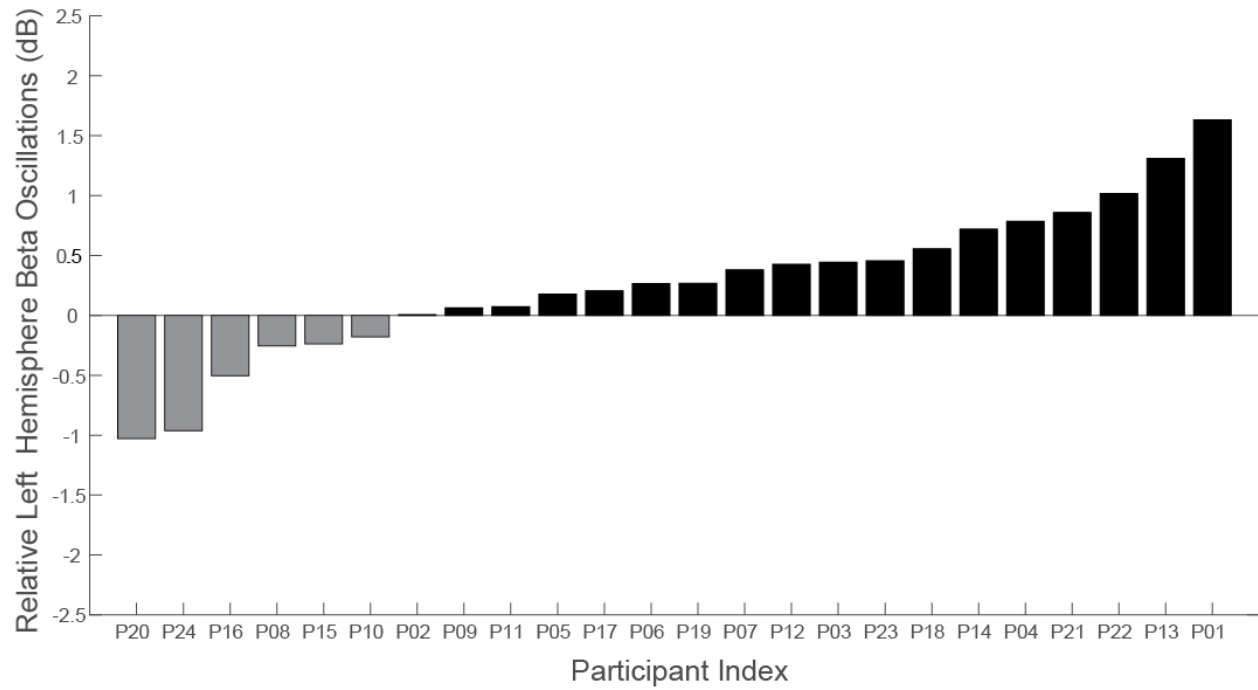

a) Individual relative left hemisphere beta oscillations (12-30 Hz) post left DLPFC tSMS.

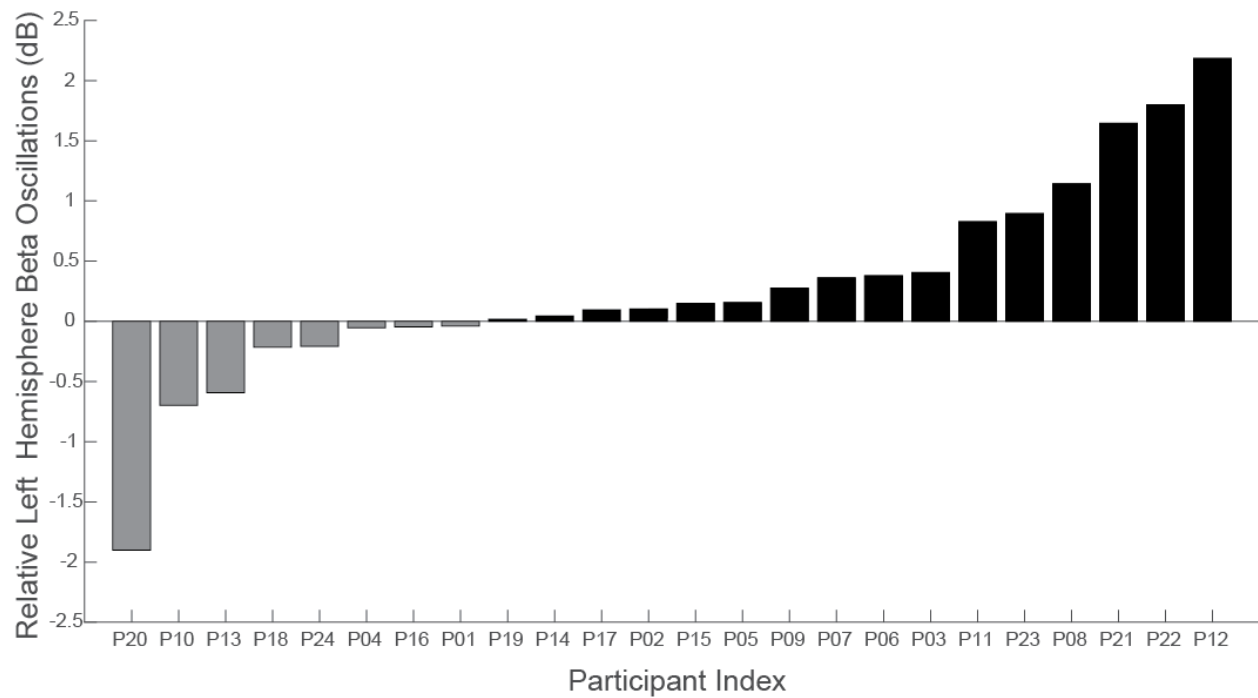

**b)** Individual relative left hemisphere beta oscillations (12-30 Hz) post right DLPFC tSMS.

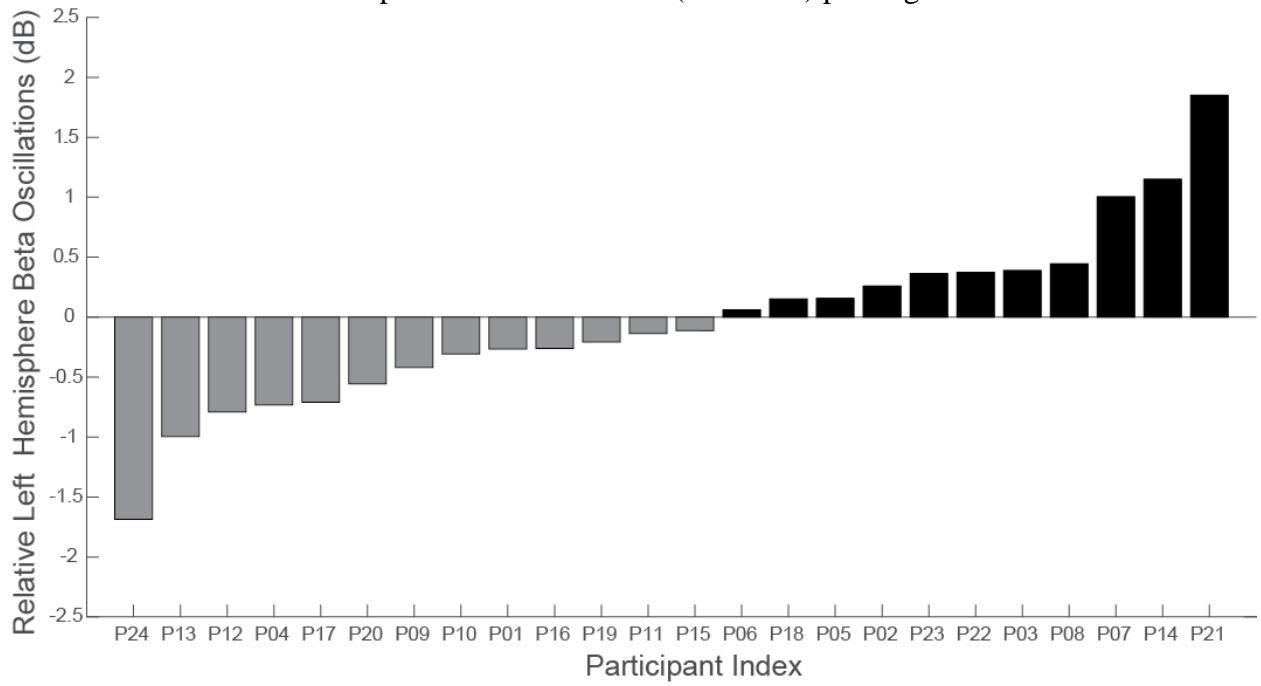

**c)** Individual relative left hemisphere beta oscillations (12-30 Hz) post sham DLPFC tSMS.
